## Retraction

# Retraction: MicroRNA-506 inhibits rheumatoid arthritis fibroblast-like synoviocytes proliferation and induces apoptosis by targeting TLR4

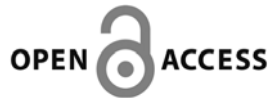

This article is being retracted from *Bioscience Reports* at the request of the Editorial Board following receipt of a notification from a reader, alerting the Editorial Office to duplications in the Western blots of Figure 2D and flow-cytometry in Figure 3A which have been published in several other publications by different authors.

The authors contacted the Editorial Office to request a Correction however, given the extent of the issues raised, the Editorial Board stand by the decision to retract the article. The authors disagree to the Retraction.

Version of Record published:  
28 July 2021
